# Supplementary material for: Source Tracking Based on Core Genome SNV and CRISPR Typing of Salmonella enterica Serovar Heidelberg Isolates Involved in Foodborne Outbreaks in Québec, 2012
Source: Front Microbiol. 2020 Jun 17;11:1317. doi: 10.3389/fmicb.2020.01317 (PMC7311582; doi:10.3389/fmicb.2020.01317)
Supplement: Supplementary file 4 [file Table_3.xlsx]

## Sheet: CRISPRTarget_Protospacers
	Table S3 : Identified protospacers in phage and plasmid sequences using CRISPRTarget.
#Spacer(Sp)_ID	Protospacer_seq_id	Protospacer_start	Protospacer_stop	Score	Spacer_seq	Protospacer_seq	Protospacer_description	Mismatch
CR1-Sp5	NZ_CP016838.1	132154	132123	22	UCUGGUUAUAACAUCGCAGCAAAAUCAAAAGA	TCTTTCGATTTTGCTGCAATGTTGAAATCAGA	Salmonella enterica subsp. enterica serovar Senftenberg strain 775W plasmid pSSE-ATCC-43845, complete sequence	5
	NZ_CP010179.1	69260	69229	22	UCUGGUUAUAACAUCGCAGCAAAAUCAAAAGA	TCTTTCGATTTTGCTGCAATGTTGAAATCAGA	Escherichia coli strain H15 plasmid A, complete genome	5
CR1-Sp10	NC_009927.1	338014	337987	18	GACGCGUUCCAGCGCACGUUACUCGAUC	GATTGAGGAACGTGCGCTGGAACGATTA	Acaryochloris marina MBIC11017 plasmid pREB2, complete sequence	5
	NZ_CP032827.1	135463	135436	20	GACGCGUUCCAGCGCACGUUACUCGAUC	GATCGAGGAACGTGCGCTGGACGGCGAC	Sphingomonas sp. YZ-8 plasmid unnamed2, complete sequence	4
CR1-Sp21	KT630649	37282	37313	22	CCGCUGACGCACUGGAUCAACCUGACGCAACG	CGCTGCGTCAAGTCAATCCAGTGCTTCAGCGG	Salmonella phage SEN34, complete genome	5
CR1-Sp26	NZ_CP025013.1	336391	336428	32	CGUCACUACCGAGACCGAGACCGAGACCGAGACCGAGA	TCTCGGTCTCGGTCTCGGTCTCGGTCTCGGTCTCGACG	Rhizobium leguminosarum strain Norway plasmid pRLN1, complete sequence	3
CR1-Sp29	NC_015969.1	32468	32437	22	GGGAAAAAUCAAUAAAAUCAAUGAUAAGCAGU	ACTGCTTATCATTGATTTTATTCTACTTTTCC	Enterobacter asburiae LF7a plasmid pENTAS02, complete sequence	5
	JQ182729	21540	21571	22	GGGAAAAAUCAAUAAAAUCAAUGAUAAGCAGU	ACTGCTTATCATTGATTTTATTCTAGTTTTCC	Enterobacterial phage mEp390, complete genome	5
CR2-Sp17	NZ_CP035342.1	1348	1379	28	GCAGCGGUUGAGUAACUCCUCGUCCACGUCGA	TCGACGTTGACGAGGAGTTACTCAACCGTTGC	Escherichia coli strain BR29-DEC plasmid unnamed7	2
	NZ_CP035358.1	4599	4630	28	GCAGCGGUUGAGUAACUCCUCGUCCACGUCGA	TCGACGTTGACGAGGAGTTACTCAACCGTTGC	Escherichia coli strain BR64-DEC plasmid unnamed6	2
	NZ_CP035365.1	2144	2113	28	GCAGCGGUUGAGUAACUCCUCGUCCACGUCGA	TCGACGTTGACGAGGAGTTACTCAACCGTTGC	Escherichia coli strain BR10-DEC plasmid unnamed5	2
	NZ_CP035348.1	381	350	26	GCAGCGGUUGAGUAACUCCUCGUCCACGUCGA	TCGACGTTGACGAAGAGTTACTCAACCGTTGC	Escherichia coli strain BR29-DEC plasmid unnamed13	3
	NC_017575.1	159719	159688	26	GCAGCGGUUGAGUAACUCCUCGUCCACGUCGA	TCGACGTGGACGAAGAGCTGCTCAACCGCTGC	Ralstonia solanacearum Po82 megaplasmid, complete sequence	3
	NZ_CP012940.1	1842650	1842681	26	GCAGCGGUUGAGUAACUCCUCGUCCACGUCGA	TCGACGTGGACGAAGAGCTGCTCAACCGCTGC	Ralstonia solanacearum strain UW163 plasmid, complete sequence	3
